# Supplementary material for: Diversity of Tick-Borne Pathogens in Tick Larvae Feeding on Breeding Birds in France
Source: MDPI journal article supplement (doi:10.3390/pathogens11080946), 2022-08-20
Supplement: s1 [file s1]

**Table S1.** Number of ticks per host bird species.

| Tick<br>Species<br>Bird Species          | <i>I.<br/>ricinus</i> | <i>I.<br/>frontalis</i> | <i>I.<br/>arboricola</i> | <i>Ixodes<br/>spp.</i> | <i>H.<br/>concinna</i> | <i>H.<br/>punctata</i> | <i>Haemaphysalis<br/>spp.</i> | <i>Hyalomma<br/>spp.</i> | <i>Rhipicephalu<br/>s<br/>spp.</i> | Unidentifie<br>d |
|------------------------------------------|-----------------------|-------------------------|--------------------------|------------------------|------------------------|------------------------|-------------------------------|--------------------------|------------------------------------|------------------|
| <i>Acrocephalus arundinaceus</i>         | 1                     | 0                       | 0                        | 0                      | 0                      | 0                      | 0                             | 0                        | 0                                  | 0                |
| <i>Acrocephalus palustris</i>            | 35                    | 0                       | 0                        | 0                      | 0                      | 0                      | 0                             | 0                        | 0                                  | 0                |
| <i>Acrocephalus schoenobaenus</i>        | 6                     | 0                       | 0                        | 0                      | 0                      | 0                      | 0                             | 0                        | 0                                  | 1                |
| <i>Acrocephalus scirpaceus</i>           | 19                    | 0                       | 0                        | 0                      | 0                      | 0                      | 0                             | 5                        | 0                                  | 3                |
| <i>Aegithalos caudatus</i>               | 1                     | 0                       | 0                        | 0                      | 0                      | 0                      | 0                             | 0                        | 0                                  | 2                |
| <i>Anthus trivialis</i>                  | 40                    | 0                       | 0                        | 0                      | 0                      | 0                      | 1                             | 0                        | 0                                  | 3                |
| <i>Aquila chrysaetos</i>                 | 0                     | 0                       | 0                        | 0                      | 0                      | 14                     | 0                             | 0                        | 0                                  | 1                |
| <i>Aquila fasciata</i>                   | 0                     | 0                       | 0                        | 0                      | 0                      | 0                      | 0                             | 0                        | 2                                  | 0                |
| <i>Athene noctua</i>                     | 0                     | 0                       | 1                        | 0                      | 0                      | 0                      | 0                             | 0                        | 0                                  | 0                |
| <i>Carduelis cannabina</i>               | 4                     | 0                       | 0                        | 0                      | 0                      | 0                      | 0                             | 0                        | 0                                  | 0                |
| <i>Carduelis chloris</i>                 | 1                     | 0                       | 0                        | 0                      | 0                      | 0                      | 0                             | 0                        | 0                                  | 0                |
| <i>Cettia cetti</i>                      | 3                     | 0                       | 0                        | 0                      | 0                      | 0                      | 0                             | 0                        | 0                                  | 1                |
| <i>Coccothraustes<br/>coccothraustes</i> | 28                    | 0                       | 0                        | 0                      | 2                      | 0                      | 1                             | 0                        | 0                                  | 2                |
| <i>Cyanistes caeruleus</i>               | 16                    | 1                       | 1                        | 2                      | 5                      | 0                      | 1                             | 0                        | 0                                  | 9                |
| <i>Emberiza cirrus</i>                   | 0                     | 0                       | 0                        | 0                      | 2                      | 0                      | 0                             | 0                        | 0                                  | 1                |
| <i>Emberiza schoeniclus</i>              | 3                     | 0                       | 0                        | 0                      | 0                      | 0                      | 0                             | 0                        | 0                                  | 0                |
| <i>Erithacus rubecula</i>                | 444                   | 4                       | 0                        | 0                      | 0                      | 0                      | 0                             | 0                        | 0                                  | 33               |
| <i>Fringilla coelebs</i>                 | 54                    | 1                       | 0                        | 0                      | 0                      | 0                      | 0                             | 0                        | 0                                  | 3                |
| <i>Garrulus glandarius</i>               | 116                   | 3                       | 0                        | 0                      | 0                      | 0                      | 0                             | 0                        | 0                                  | 26               |
| <i>Hippolais polyglotta</i>              | 13                    | 1                       | 0                        | 0                      | 0                      | 0                      | 0                             | 0                        | 0                                  | 0                |
| <i>Hirundo rustica</i>                   | 0                     | 0                       | 0                        | 0                      | 0                      | 0                      | 0                             | 0                        | 0                                  | 2                |
| <i>Lanius collurio</i>                   | 11                    | 0                       | 0                        | 0                      | 0                      | 0                      | 0                             | 0                        | 0                                  | 1                |
| <i>Leiothrix lutea</i>                   | 0                     | 1                       | 0                        | 0                      | 0                      | 0                      | 0                             | 0                        | 0                                  | 0                |
| <i>Limosa limosa</i>                     | 0                     | 0                       | 0                        | 0                      | 0                      | 2                      | 0                             | 0                        | 0                                  | 0                |
| <i>Lophophanes cristatus</i>             | 2                     | 0                       | 0                        | 0                      | 0                      | 0                      | 0                             | 0                        | 0                                  | 0                |
| <i>Lullula arborea</i>                   | 1                     | 0                       | 0                        | 0                      | 0                      | 0                      | 0                             | 0                        | 0                                  | 0                |
| <i>Luscinia megarhynchos</i>             | 112                   | 0                       | 0                        | 0                      | 1                      | 0                      | 0                             | 0                        | 0                                  | 9                |



**Table S2.** Number of TBP-positive engorged tick larvae per pathogen and host bird species.

[illegible]

|                                |    |   |   |     |   |   |    |    |    |   |   |   |   |   |    |    |    |
|--------------------------------|----|---|---|-----|---|---|----|----|----|---|---|---|---|---|----|----|----|
| <i>Sylvia communis</i>         | 1  | 0 | 1 | 0   | 0 | 0 | 0  | 2  | 0  | 0 | 0 | 0 | 0 | 0 | 1  | 0  | 0  |
| <i>Sylvia curruca</i>          | 0  | 0 | 0 | 1   | 0 | 0 | 0  | 0  | 0  | 0 | 0 | 0 | 0 | 0 | 0  | 0  | 0  |
| <i>Sylvia undata</i>           | 0  | 0 | 0 | 1   | 0 | 0 | 0  | 0  | 0  | 0 | 0 | 0 | 0 | 0 | 0  | 0  | 0  |
| <i>Troglodytes troglodytes</i> | 1  | 0 | 0 | 8   | 0 | 0 | 1  | 0  | 0  | 0 | 0 | 0 | 0 | 0 | 2  | 0  | 1  |
| <i>Turdus merula</i>           | 14 | 0 | 0 | 55  | 0 | 0 | 12 | 0  | 2  | 0 | 0 | 4 | 0 | 0 | 9  | 0  | 1  |
| <i>Turdus philomelos</i>       | 4  | 0 | 0 | 15  | 1 | 3 | 6  | 3  | 2  | 0 | 0 | 0 | 0 | 0 | 3  | 0  | 3  |
| <i>Turdus pilaris</i>          | 0  | 0 | 1 | 0   | 0 | 0 | 0  | 0  | 0  | 0 | 0 | 0 | 0 | 0 | 0  | 0  | 0  |
| <b>Total</b>                   | 63 | 2 | 2 | 100 | 1 | 4 | 20 | 11 | 22 | 3 | 1 | 9 | 5 | 4 | 45 | 10 | 23 |

*A. pha* = *A. phagocytophilum*, *B. afz* = *B. afzelii*, *Bbss* = *Borrelia burgdorferi* sensu stricto, *B. gar* = *B. garinii*, *Bor spp.* = *Borrelia spp.*, *B. tur* = *B. turdi*, *B. val* = *B. valaisiana*, *B. miy* = *B. miyamotoi*, *Bab spp.* = *Babesia spp.*, *B. ven* = *B. venatorum*, *E. can* = *E. canis*, *Ehr spp.* = *Ehrlichia spp.*, *Close to E. chaff* = *Close to E. chaffeensis*, *R. aes* = *R. aeschlimannii*, *R. hel* = *R. helvetica*, *R. slo* = *R. slovaca*, *Rick. spp.* = *Rickettsia spp.*

**Table S3.** Accession numbers of submitted sequences.

| Tick and Tick-Borne Pathogen Species      | Accession Number | Percent Identity to GenBank Sequence | Comment                                                                                                                                               |
|-------------------------------------------|------------------|--------------------------------------|-------------------------------------------------------------------------------------------------------------------------------------------------------|
| <i>I. ricinus</i>                         | ON387755         | 100%                                 | Compared to the sequence KF197132.1 in GenBank that came from a host-seeking female collected in Italy                                                |
| <i>I. frontalis</i>                       | ON387754         | 99.8%                                | Compared to the sequence KU170492.1 in GenBank that came from a tick collected in Hungary                                                             |
| <i>H. concinna</i>                        | ON303650         | 100%                                 | Compared to the sequence KY364906.1 in GenBank that came from a tick collected in China                                                               |
| <i>H. punctata</i>                        | ON387756         | 100%                                 | Compared to the sequence NC_062064.1 in GenBank that came from an adult tick collected on cattle in China                                             |
| <i>B. venatorum</i>                       | ON171470         | 99.6%                                | Compared to the sequence MG344777.1 in GenBank that came from the blood of <i>Capreolus capreolus</i> in Czech Republic                               |
| <i>B. afzelii</i>                         | ON310820)        | 100%                                 | Compared to the sequence MT007941.1 in GenBank that came from a host-seeking tick collected in Russia                                                 |
| <i>Borrelia burgdorferi sensu stricto</i> | ON310821         | 100%                                 | Compared to the sequence MF150052.1 in GenBank that came from a host seeking <i>I. ricinus</i> collected in Poland                                    |
| <i>B. garinii</i>                         | ON310822         | 99.5%                                | Compared to the sequence KU672556.1 in GenBank that came from a host-seeking <i>I. persulcatus</i> collected in Russia                                |
| <i>B. turdi</i>                           | ON310824         | 98.9%                                | Compared to the sequence D85071.1 in GenBank                                                                                                          |
| <i>B. valaisiana</i>                      | ON310823         | 99.3%                                | Compared to the sequence MF150077.1 in GenBank that came from a host-seeking <i>I. ricinus</i> collected in Poland                                    |
| <i>B. miyamotoi</i>                       | ON398526         | 100%                                 | Compared to the sequence LC540659.1 in GenBank that came from an <i>I. ricinus</i> collected in Russia                                                |
| <i>E. canis</i>                           | -                | 100%                                 | Compared to the sequence MT066094.1 in GenBank that came from a <i>Rhipicephalus sanguineus</i> collected on a <i>Canis lupus familiaris</i> in Egypt |
| Close to <i>E. chaffeensis</i>            | ON390894         | 99.2%                                | Compared to the sequence NR_074500.2 in GenBank                                                                                                       |
| <i>R. aeschlimannii</i>                   | ON310825         | 100%                                 | Compared to the sequence KU961544.1 in GenBank that came from a host-seeking <i>H. marginatum</i>                                                     |

Note: *E. canis* sequence was too small to be submitted on GenBank. Here is the sequence:

CCACCTACGTGCCCTTTACGCCCAATAATTCCGAACAACGCTTGCCCCCTCCGTATTACCGCGGCTGCTGGCACAGAGTT  
TGCCGGGACTTCTTCTATAGGTACCGTCATTATCTTCCCT

**Table S4.** Percentage of co-infected larvae (calculated on the total of engorged larvae, n = 1,106).

| Pathogen Species                                                           | Percentage of Infected Larvae (n) |
|----------------------------------------------------------------------------|-----------------------------------|
| <b><i>Anaplasma</i> spp. + <i>Bbsl</i></b>                                 | <b>1% (11)</b>                    |
| <i>A. phagocytophilum</i> + <i>B. garinii</i>                              | 0.7% (8)                          |
| <i>A. phagocytophilum</i> + <i>B. valaisiana</i>                           | 0.3% (3)                          |
| <b><i>Rickettsia</i> spp. + <i>Bbsl</i></b>                                | <b>0.9% (10)</b>                  |
| <i>B. garinii</i> + <i>R. helvetica</i>                                    | 0.5% (6)                          |
| <i>B. garinii</i> + <i>R. slovaca</i>                                      | 0.1% (1)                          |
| <i>B. valaisiana</i> + <i>R. helvetica</i>                                 | 0.1% (1)                          |
| <i>B. garinii</i> + <i>Rickettsia</i> spp.                                 | 0.1% (1)                          |
| <i>B. turdi</i> + <i>Rickettsia</i> spp.                                   | 0.1% (1)                          |
| <b><i>Anaplasma</i> spp. + <i>Rickettsia</i> spp.</b>                      | <b>0.4% (4)</b>                   |
| <i>A. phagocytophilum</i> + <i>R. helvetica</i>                            | 0.3% (3)                          |
| <i>A. phagocytophilum</i> + <i>R. aeschlimannii</i>                        | 0.1% (1)                          |
| <b><i>Babesia</i> spp. + <i>Rickettsia</i> spp.</b>                        | <b>0.3% (3)</b>                   |
| <i>B. venatorum</i> + <i>Rickettsia</i> spp.                               | 0.1% (1)                          |
| <i>Babesia</i> spp. + <i>R. aeschlimannii</i>                              | 0.1% (1)                          |
| <i>Babesia</i> spp. + <i>Rickettsia</i> spp.                               | 0.1% (1)                          |
| <b><i>B. miyamotoi</i> + <i>Bbsl</i></b>                                   | <b>0.2% (2)</b>                   |
| <i>B. miyamotoi</i> + <i>B. garinii</i>                                    | 0.2% (2)                          |
| <b><i>Anaplasma</i> spp. + <i>Ehrlichia</i> spp.</b>                       | <b>0.1% (1)</b>                   |
| <i>A. phagocytophilum</i> + <i>Ehrlichia</i> spp.                          | 0.1% (1)                          |
| <b><i>Babesia</i> spp. + <i>Bbsl</i></b>                                   | <b>0.1% (1)</b>                   |
| <i>Babesia</i> spp. + <i>B. garinii</i>                                    | 0.1% (1)                          |
| <b><i>Anaplasma</i> spp. + <i>Babesia</i> spp. + <i>Rickettsia</i> spp</b> | <b>0.2% (2)</b>                   |
| <i>A. phagocytophilum</i> + <i>Babesia</i> spp. + <i>Rickettsia</i> spp.   | 0.1% (1)                          |
| <i>A. phagocytophilum</i> + <i>Babesia</i> spp. + <i>R. aeschlimannii</i>  | 0.1% (1)                          |
| <b><i>Anaplasma</i> spp.+ <i>Ehrlichia</i> spp. + <i>Bbsl</i></b>          | <b>0.1% (1)</b>                   |
| <i>A. phagocytophilum</i> + <i>B. valaisiana</i> + <i>Ehrlichia</i> spp.   | 0.1% (1)                          |
| <b><i>Anaplasma</i> spp.+ <i>Rickettsia</i> spp. + <i>Bbsl</i></b>         | <b>0.1% (1)</b>                   |
| <i>A. phagocytophilum</i> + <i>B. garinii</i> + <i>R. helvetica</i>        | 0.1% (1)                          |

|                                                                        |                 |
|------------------------------------------------------------------------|-----------------|
| <b><i>Babesia</i> spp. + <i>Ehrlichia</i> spp. + <i>Bbsl</i></b>       | <b>0.1% (1)</b> |
| <i>Babesia</i> spp. + <i>B. garinii</i> + <i>Ehrlichia</i> spp.        | 0.1% (1)        |
| <b><i>Anaplasma</i> spp. + <i>B. miyamotoi</i> + <i>Bbsl</i></b>       | <b>0.1% (1)</b> |
| <i>A. phagocytophilum</i> + <i>B. valaisiana</i> + <i>B. miyamotoi</i> | 0.1% (1)        |
| <hr/>                                                                  |                 |
| <i>Bbsl</i> : <i>Borrelia burgdorferi</i> sensu lato                   |                 |

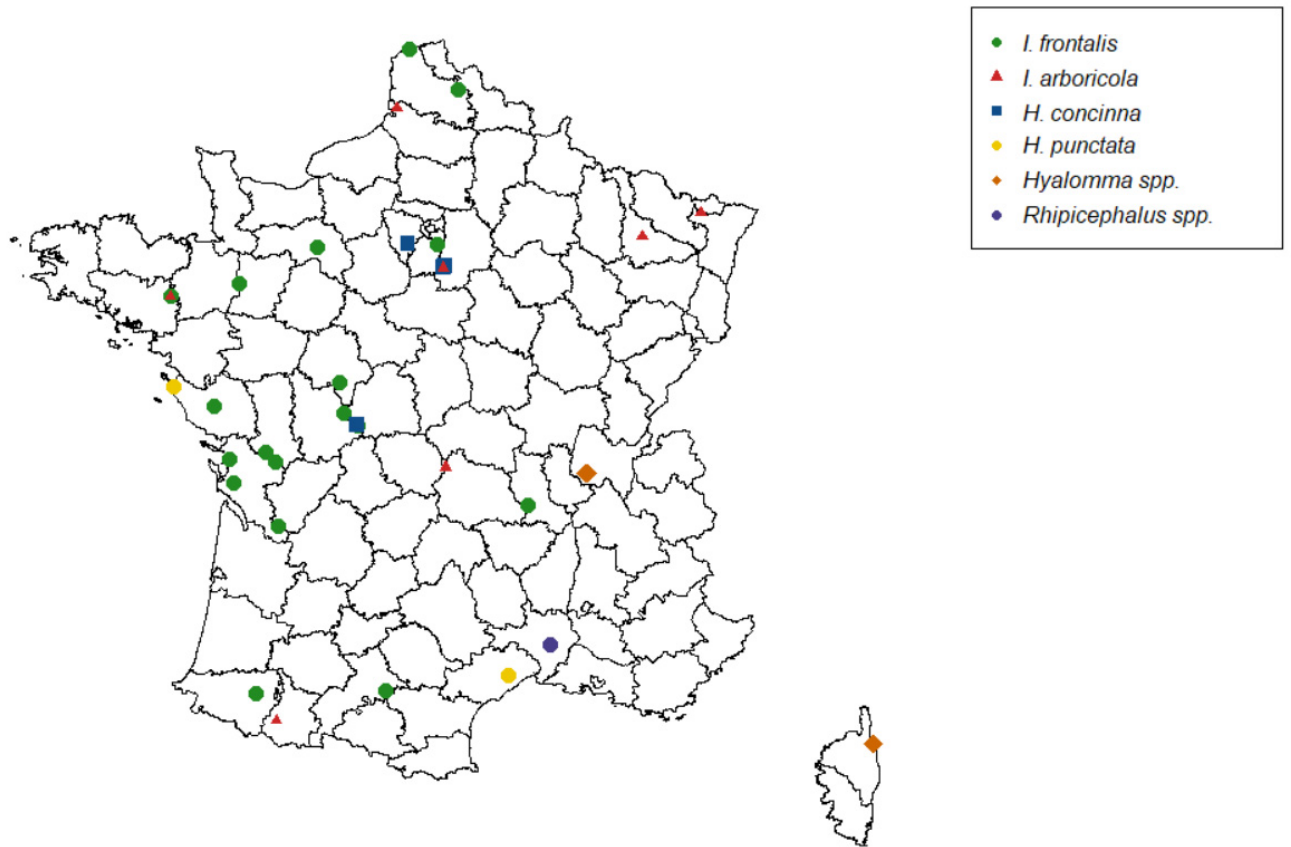

**Figure S1.** Geographical distribution of tick species other than *I. ricinus* (*I. frontalis*, *I. arboricola*, *H. concinna*, *H. punctata*, *Hyalomma* spp. and *Rhipicephalus* spp.) collected from breeding birds in 2019 and 2020. Green dots and red triangle represent the sites where *I. frontalis* and *I. arboricola* were collected respectively. Blue squares and yellow dots represent the sites where *H. concinna* and *H. punctata* ticks were collected respectively. Orange diamond represent the sites where *Hyalomma* spp. ticks were collected and purple dots represent the sites where *Rhipicephalus* spp. ticks were collected.



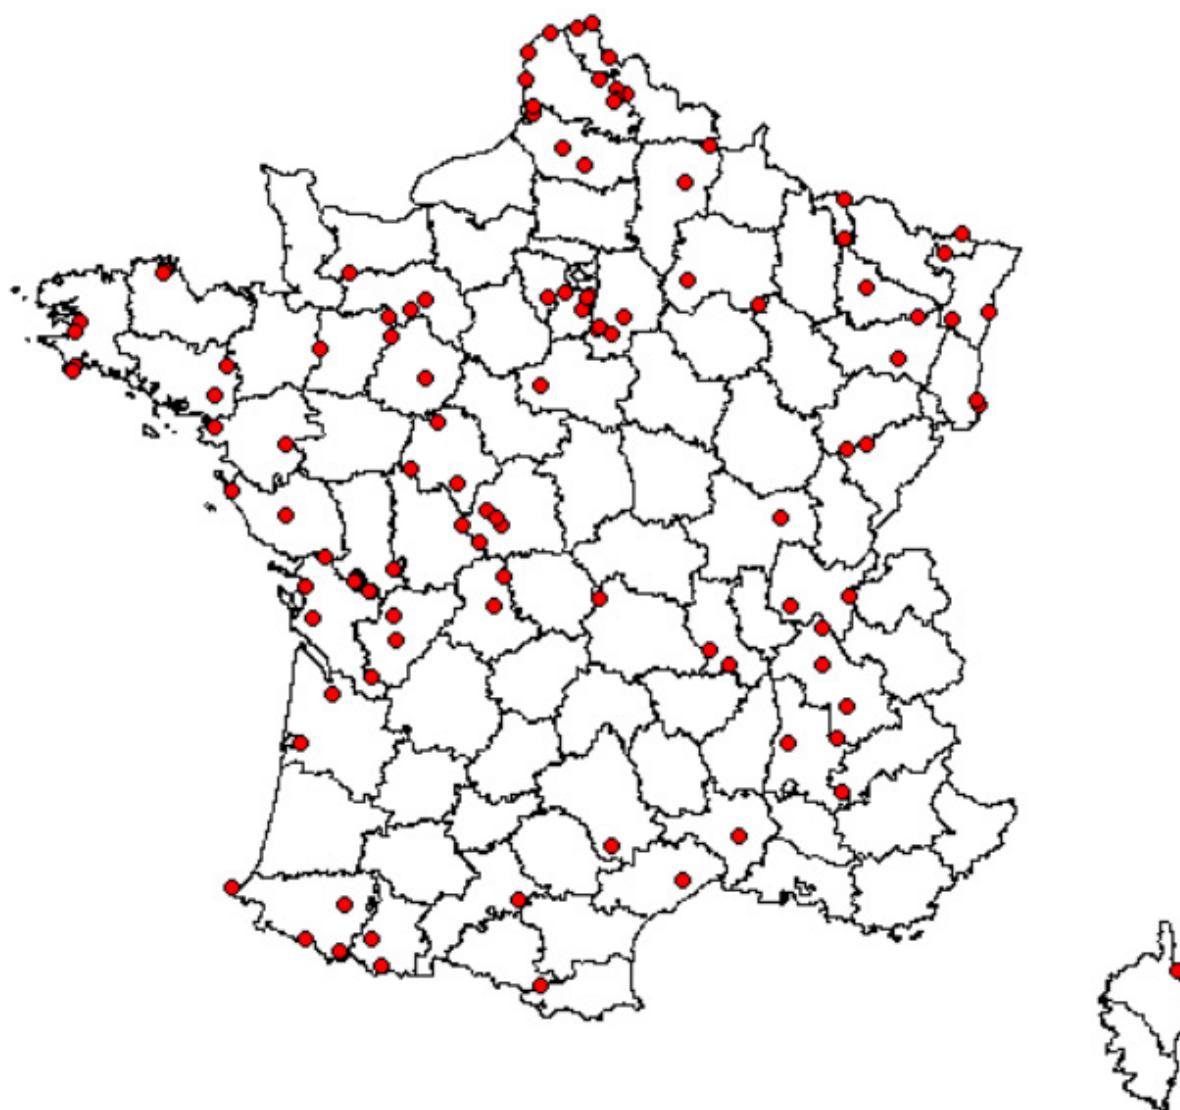

**Figure S2.** Capture sites for breeding birds in France in 2019-2020.
